# Supplementary material
Source: PubMed Central journal article supplement (PMC7271354)
Supplement: ao0c00819_si_001.pdf [file ao0c00819_si_001.pdf]

## Electronic Supporting Information

### Pickering interfacial catalysis - Knoevenagel condensation in magnesium oxide stabilized

#### Pickering emulsion

Amid L. Sadgar, Tushar S. Deore and Radha V. Jayaram\*

Department of Chemistry, Institute of Chemical Technology

Nathalal Parekh Marg, Matunga, Mumbai-400019

Email: [rv.jayaram@ictmumbai.edu.in](mailto:rv.jayaram@ictmumbai.edu.in)

**Figure S1.** Optical Microscope images - effect of particle concentration of  $\text{MgO}_{s\_400}$  on droplet size

**Figure S2.** Photographs of reaction system for substituted benzaldehydes

**Figure S3-S14** GC-MS spectra of  $\alpha,\beta$ -unsaturated condensation products

**Figure S15-S22**  $^1\text{H}$  NMR and  $^{13}\text{C}$  NMR of  $\alpha,\beta$ -unsaturated condensation products

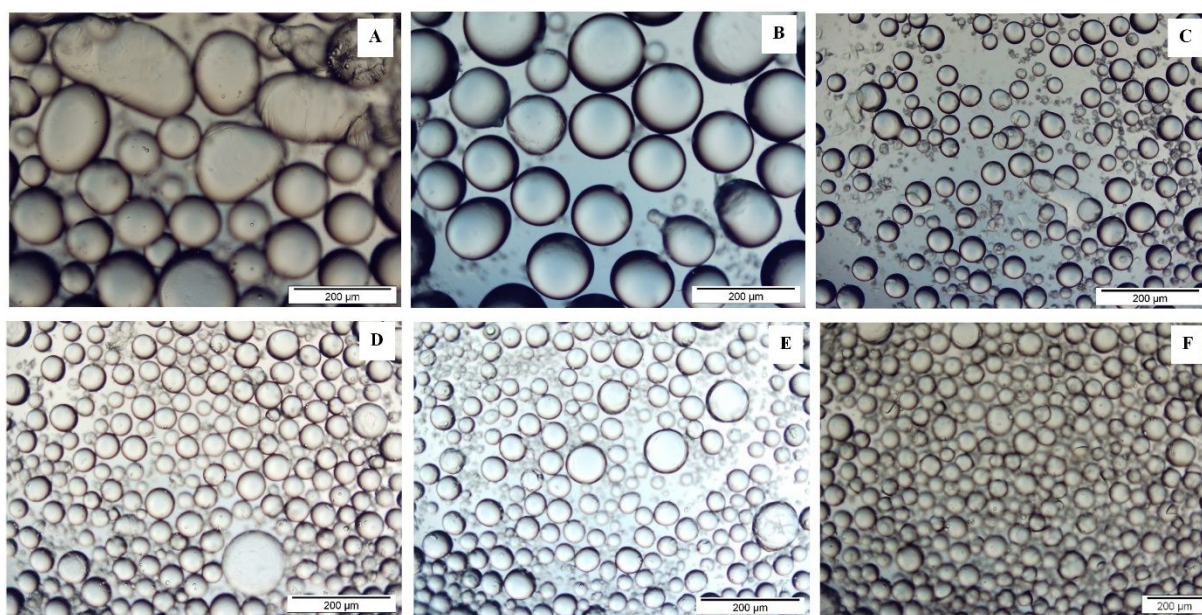

**Figure S1.** Optical microscopic images of  $\text{MgO}_{s\_400}$  stabilized emulsions at different particle concentrations (A) 0.41 mg/ml (B) 0.83 mg/ml (C) 1.66 mg/ml (D) 2.50 mg/ml (E) 3.33 mg/ml (F) 4.16 mg/ml

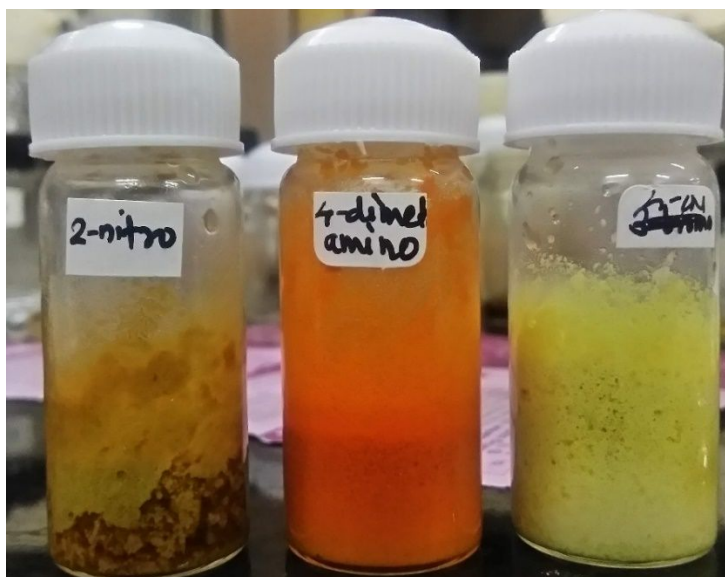

**Figure S2.** Representative photograph of reaction systems of substituted benzaldehyde

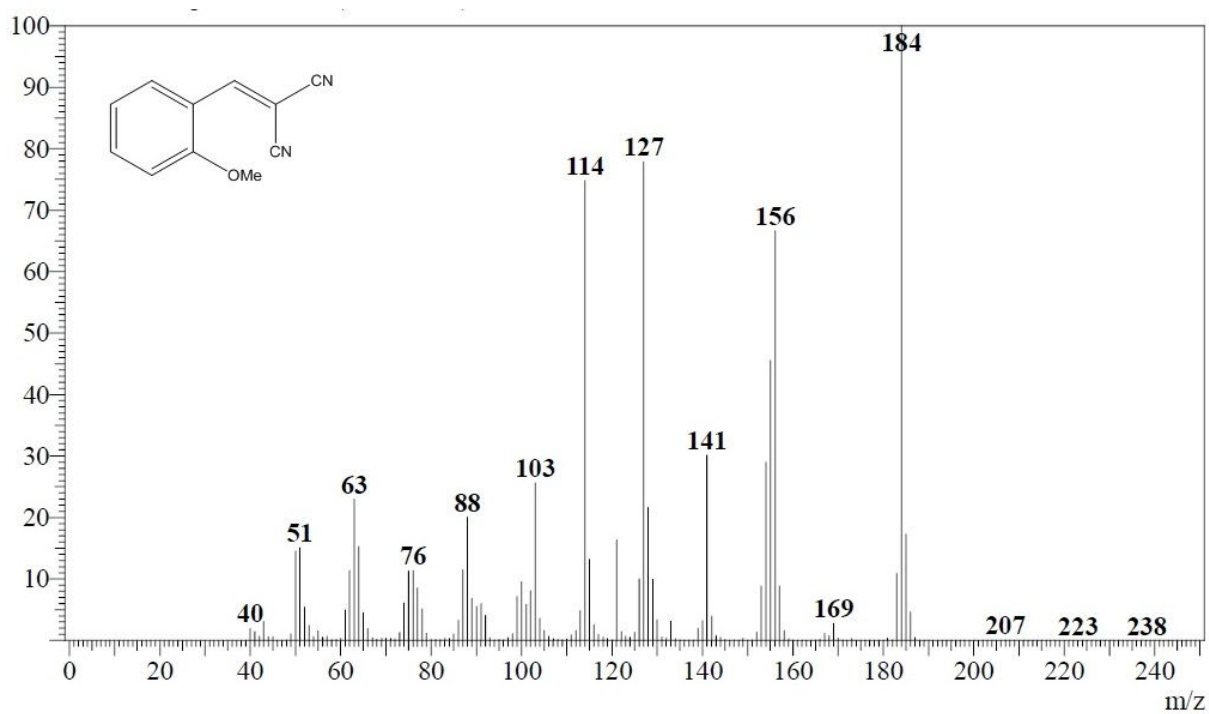

**Figure S3.** GC-MS spectra of 2-(2-methoxybenzylidene)malononitrile

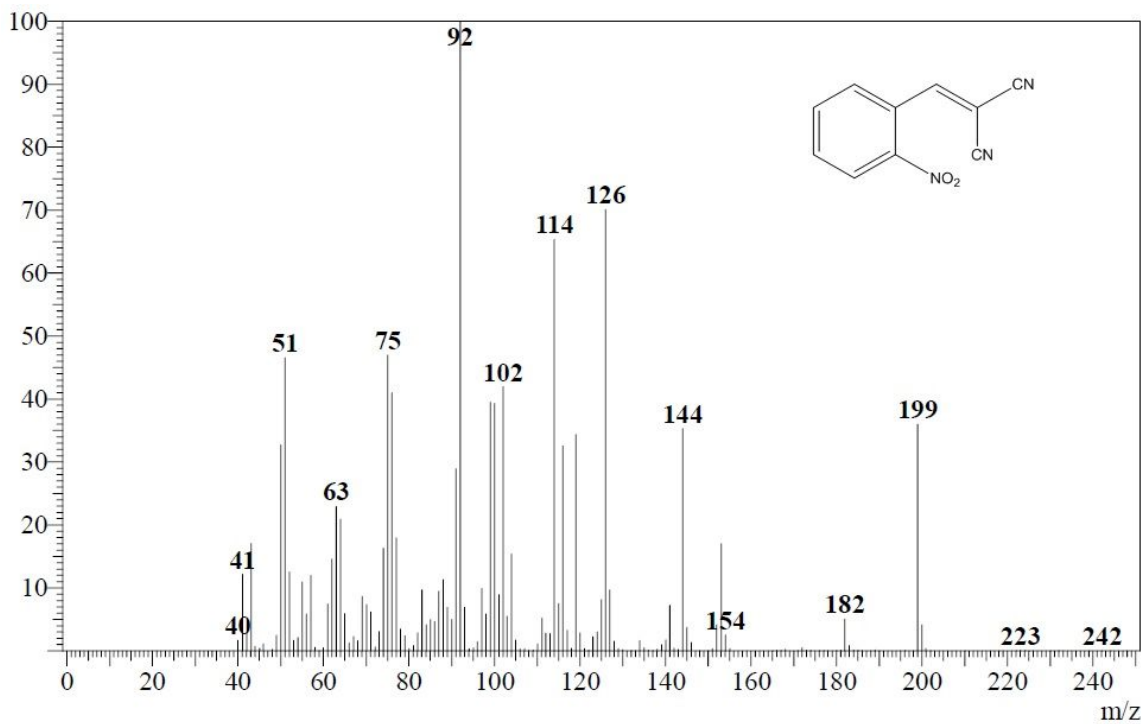

**Figure S4.** GC-MS spectra of 2-(2-nitrobenzylidene)malononitrile

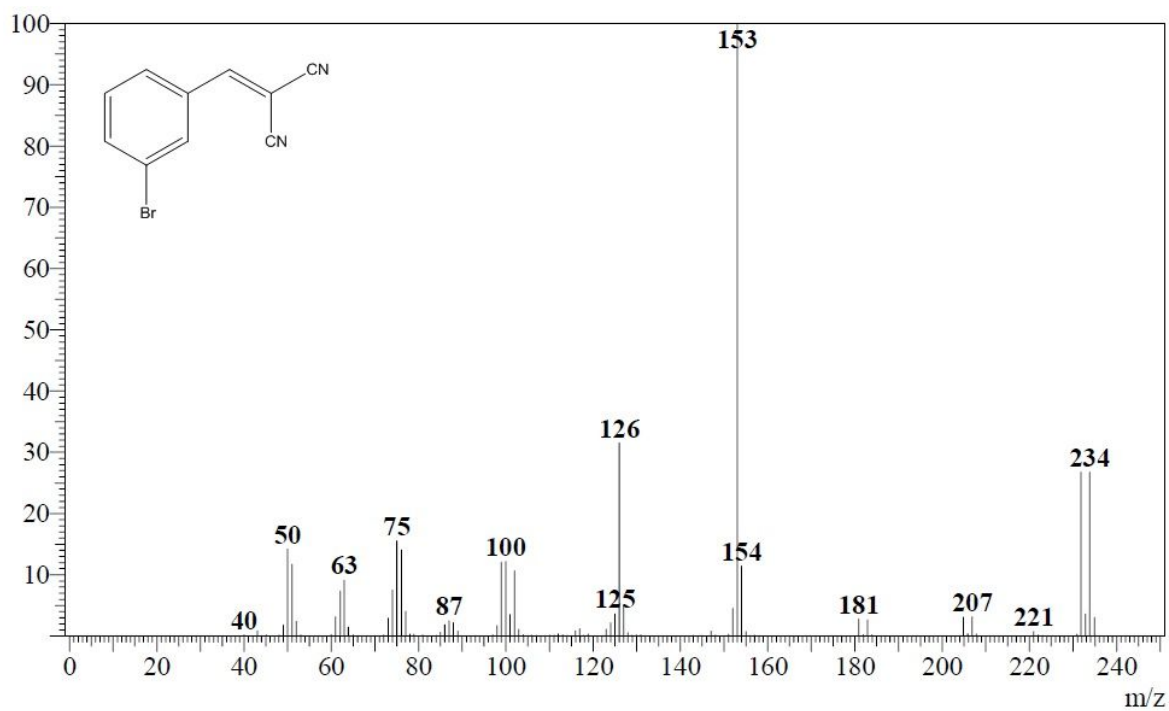

**Figure S5.** GC-MS spectra of 2-(3-bromobenzylidene)malononitrile

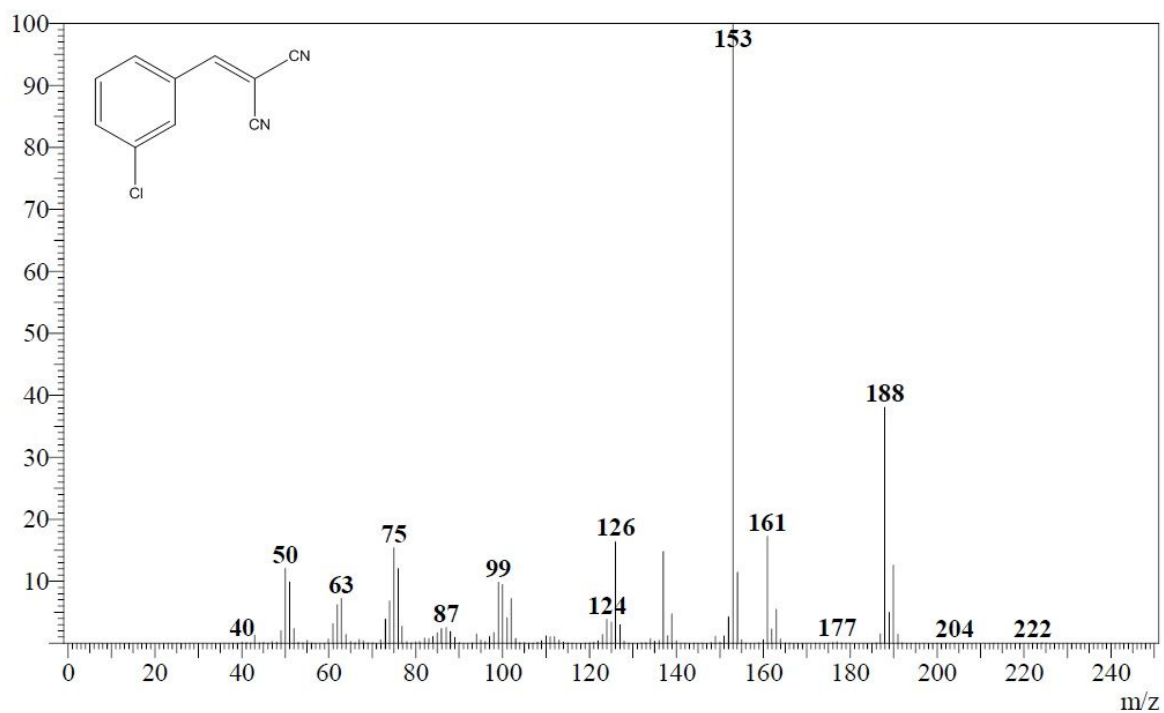

**Figure S6.** GC-MS spectra of 2-(3-chlorobenzylidene)malononitrile

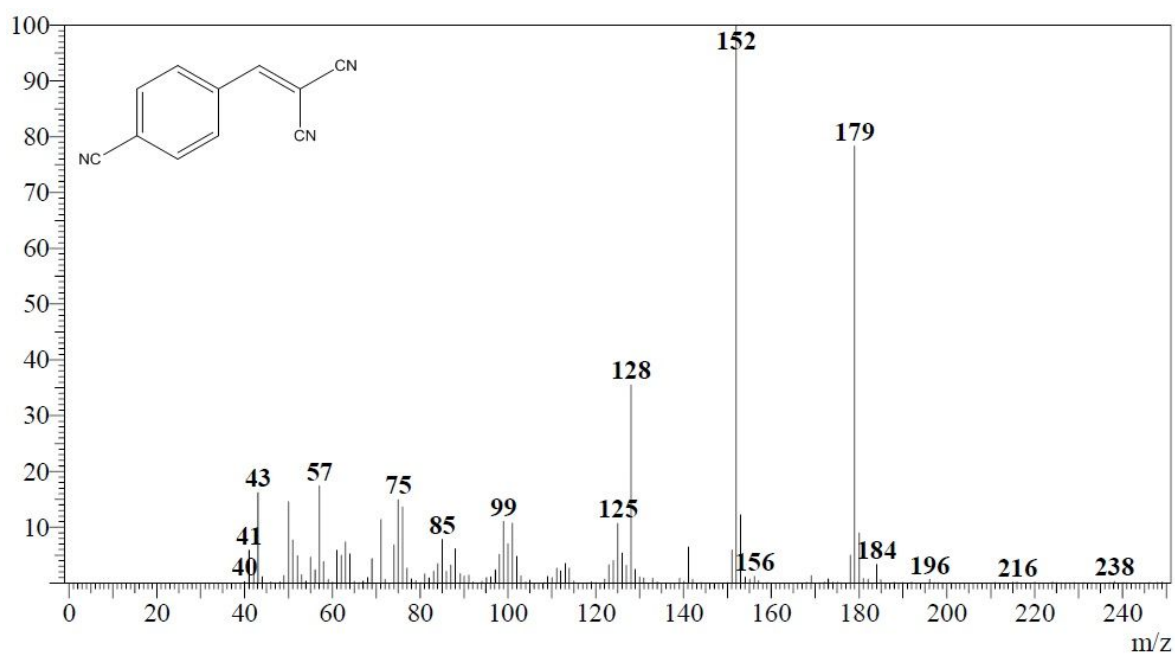

**Figure S7.** GC-MS spectra of 2-(4-cyanobenzylidene)malononitrile

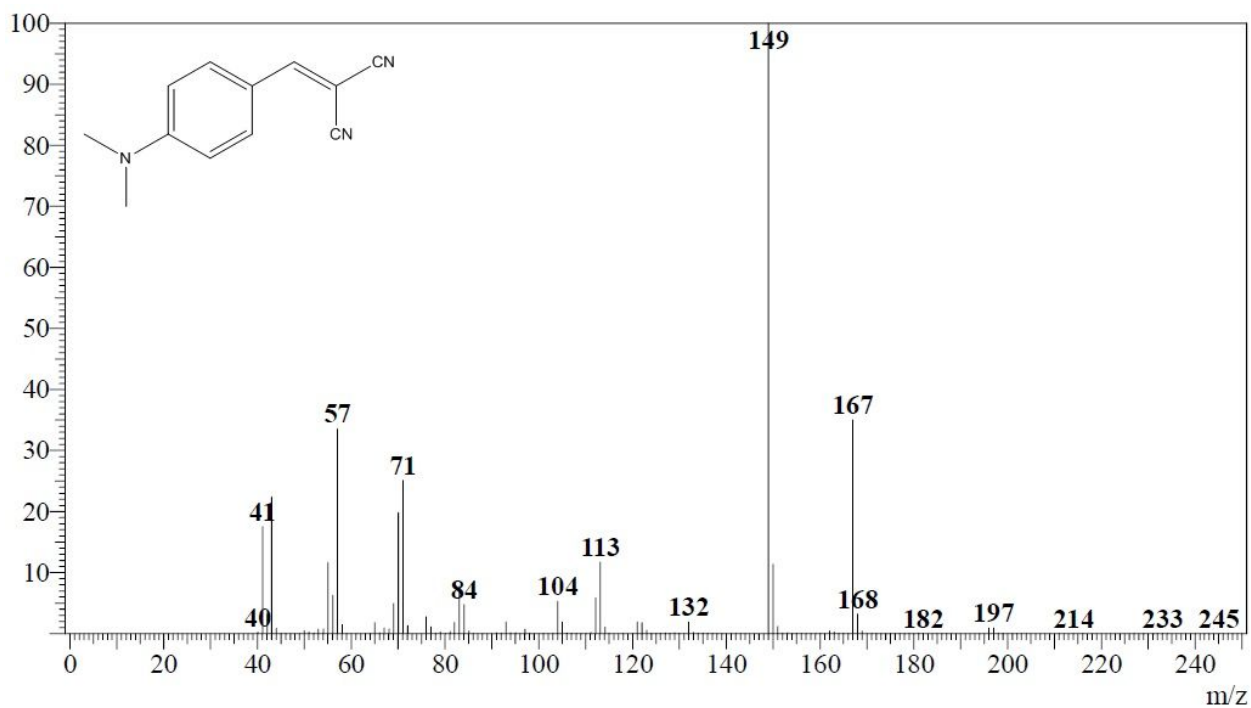

**Figure S8.** GC-MS spectra of 2-(4-(dimethylamino)benzylidene)malononitrile

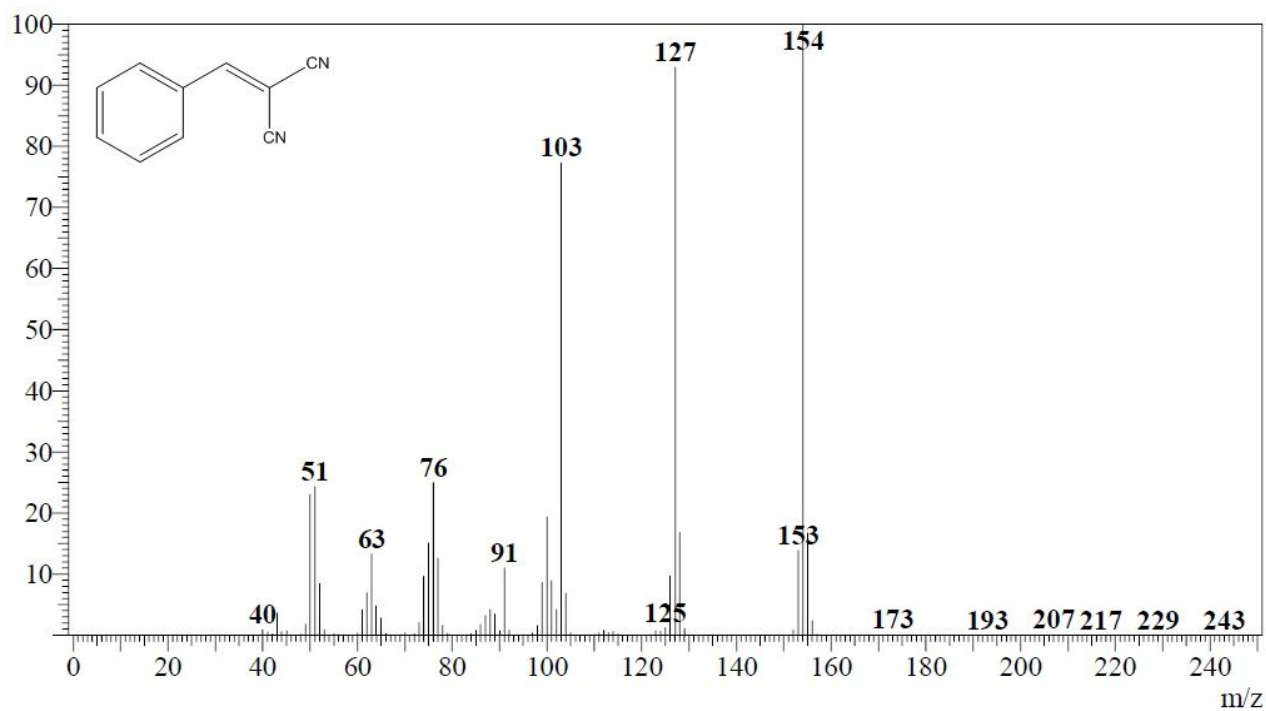

**Figure S9.** GC-MS spectra of 2-benzylidenemalononitrile

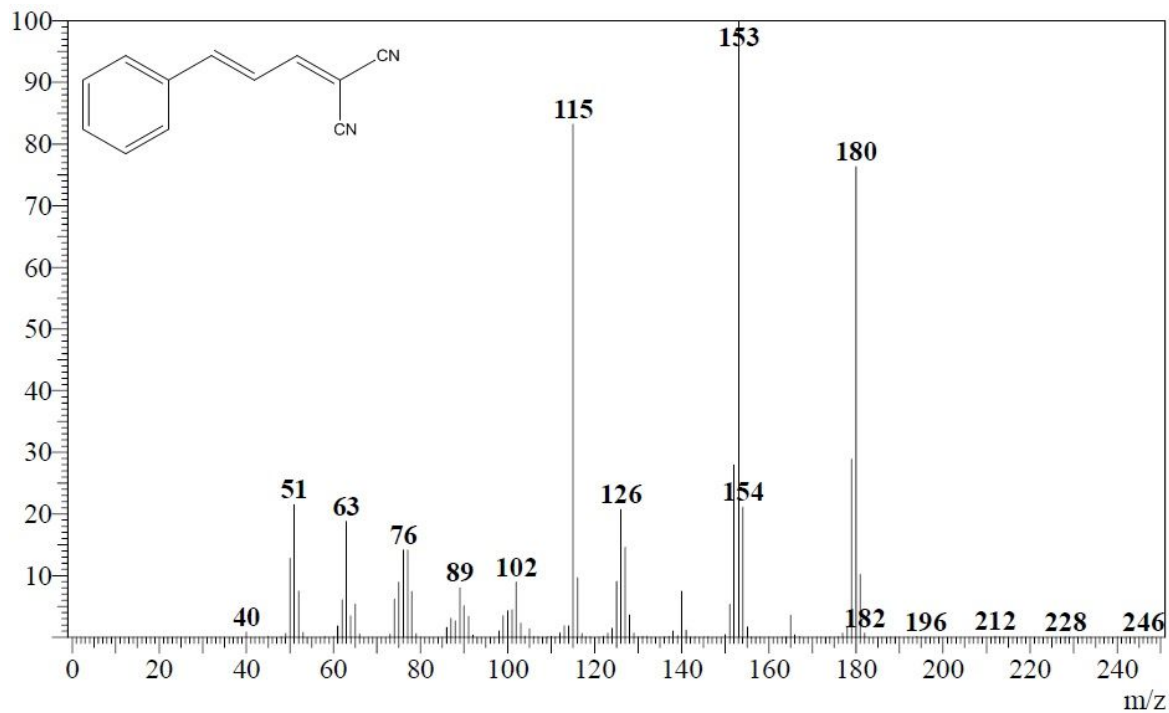

Figure S10. GC-MS spectra of 2-(3-phenylallylidene)malononitrile

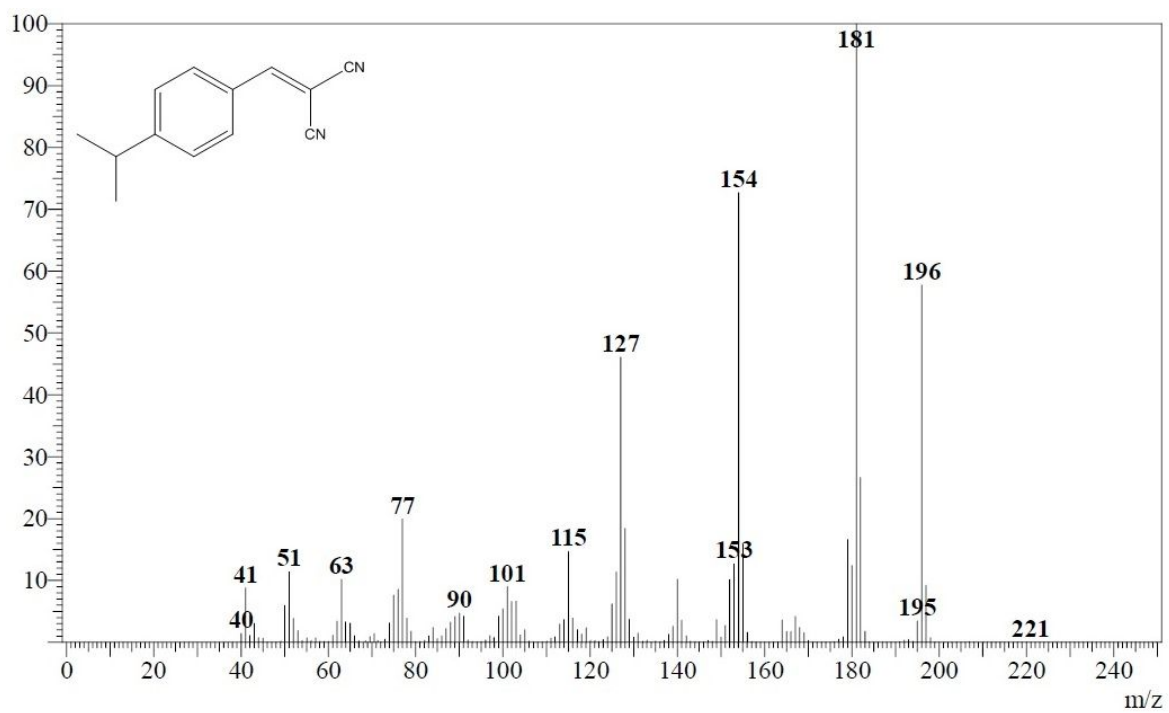

Figure S11. GC-MS spectra of 2-(4-isopropylbenzylidene)malononitrile

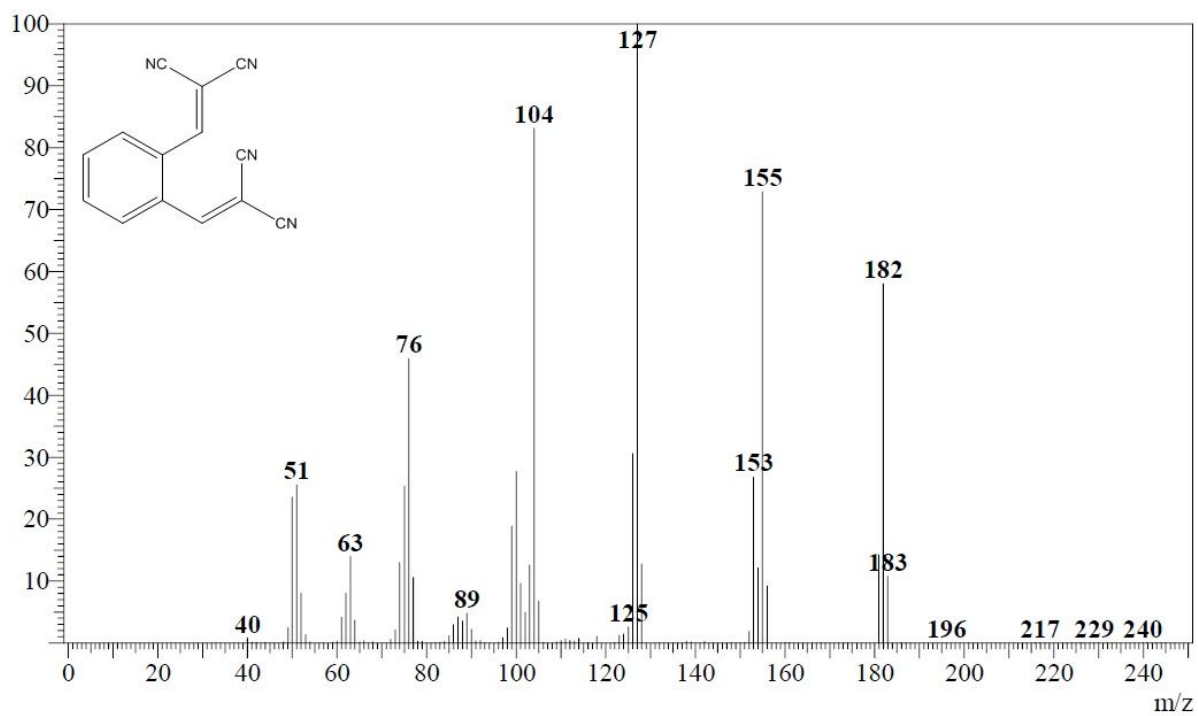

**Figure S12.** GC-MS spectra of 2,2'-(1,2-phenylenebis(methanylylidene))dimalononitrile

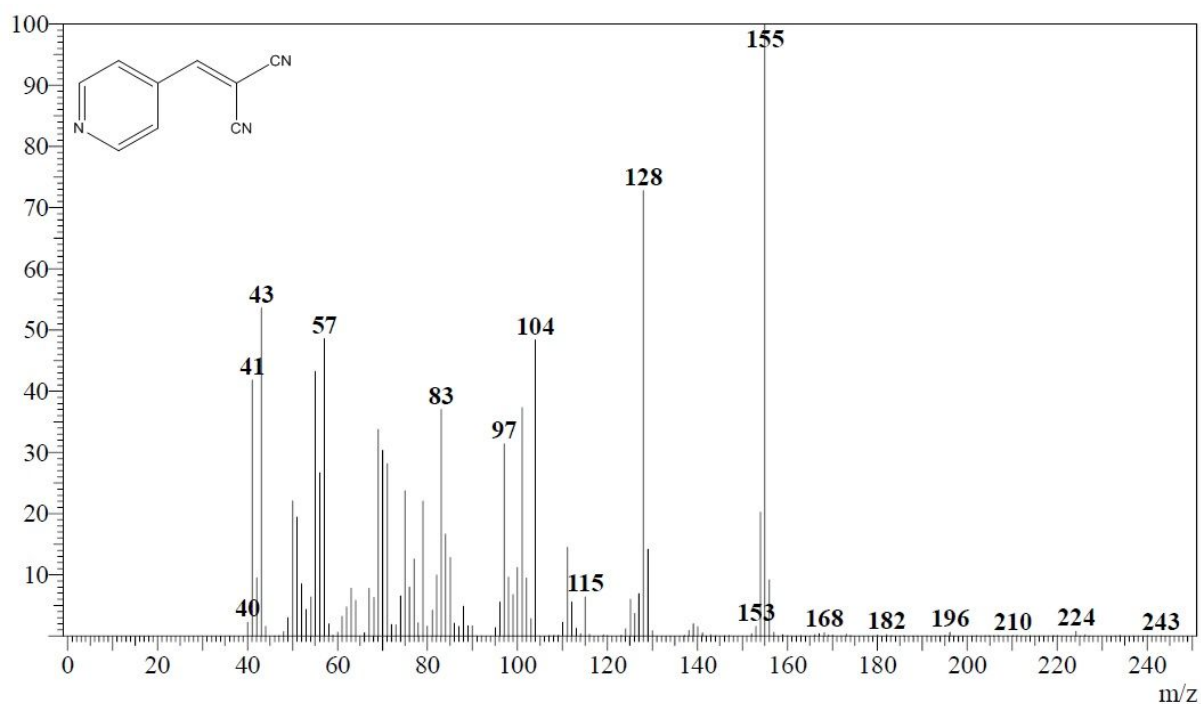

**Figure S13.** GC-MS spectra of 2-(4-pyridylmethylydene)malononitrile

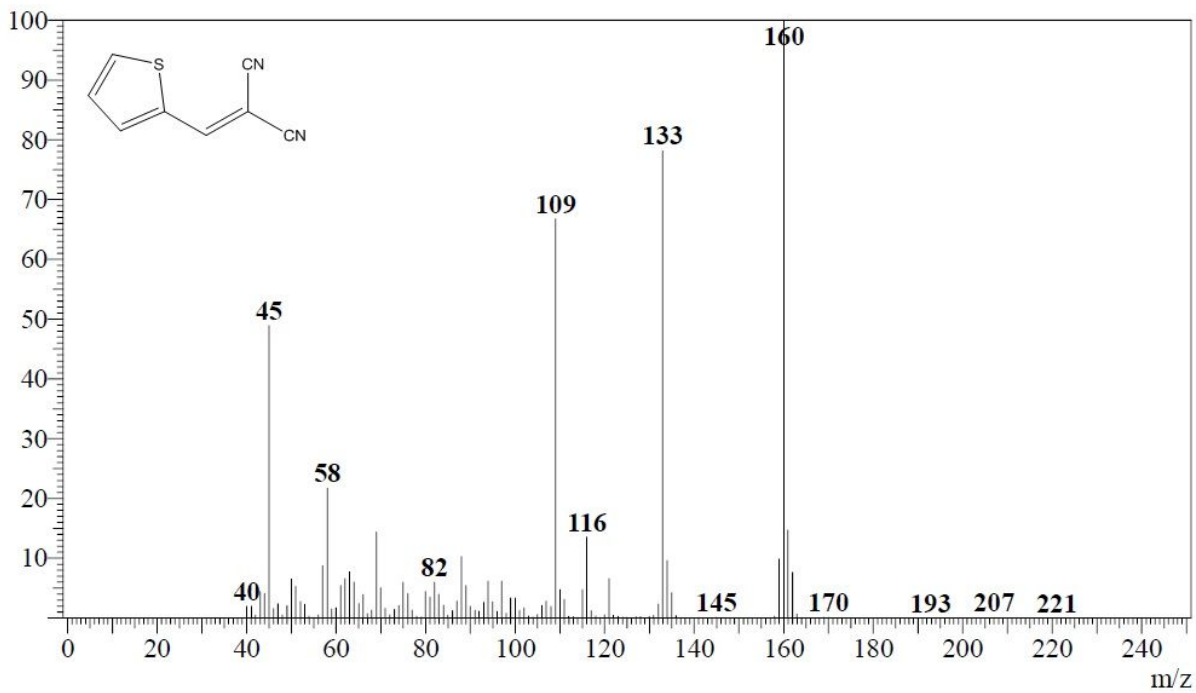

**Figure S14.** GC-MS spectra of 2-(2-thiophenylmethylidene)malononitrile





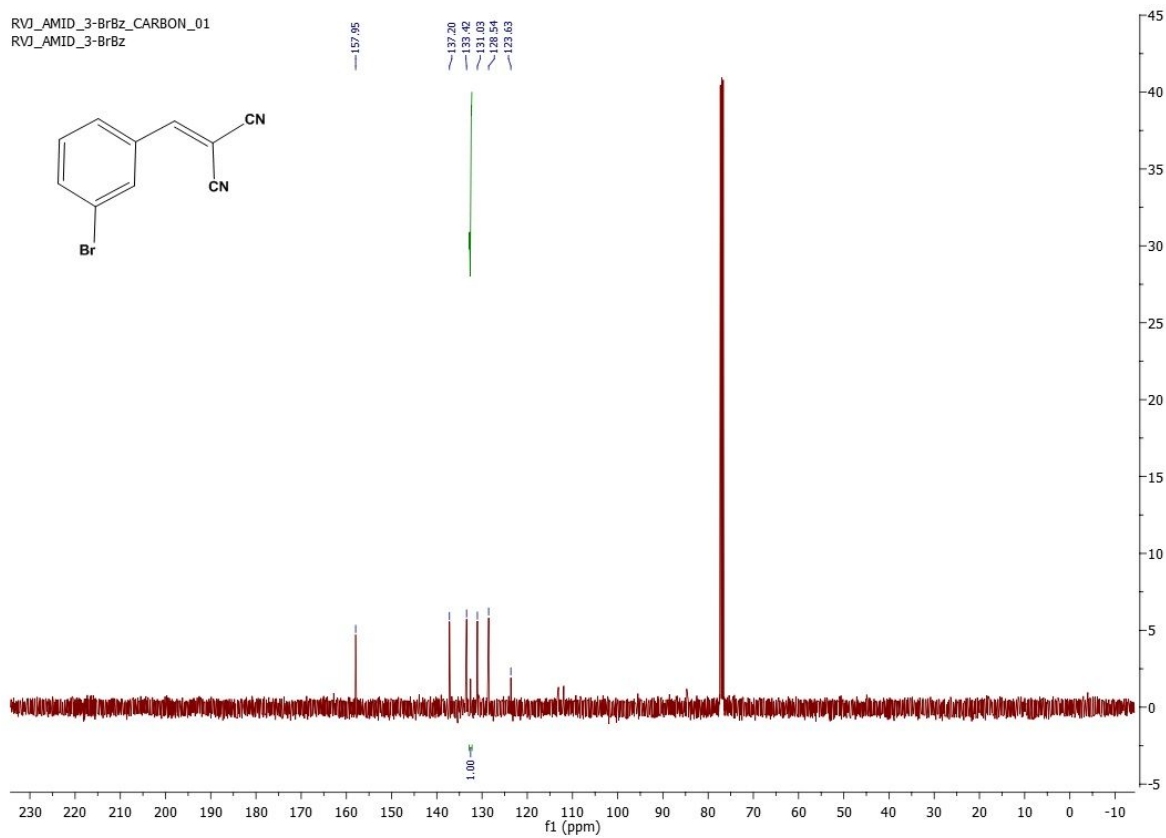

**Figure 16.**  $^{13}\text{C}$  NMR of 2-(3-bromobenzylidene)malononitrile

$^{13}\text{C}$  NMR (100MHz;  $\text{CDCl}_3$ ; 25 °C):  $\delta$  157.95, 133.42, 131.01, 132, 128.54, 123.63, 114, 113,85

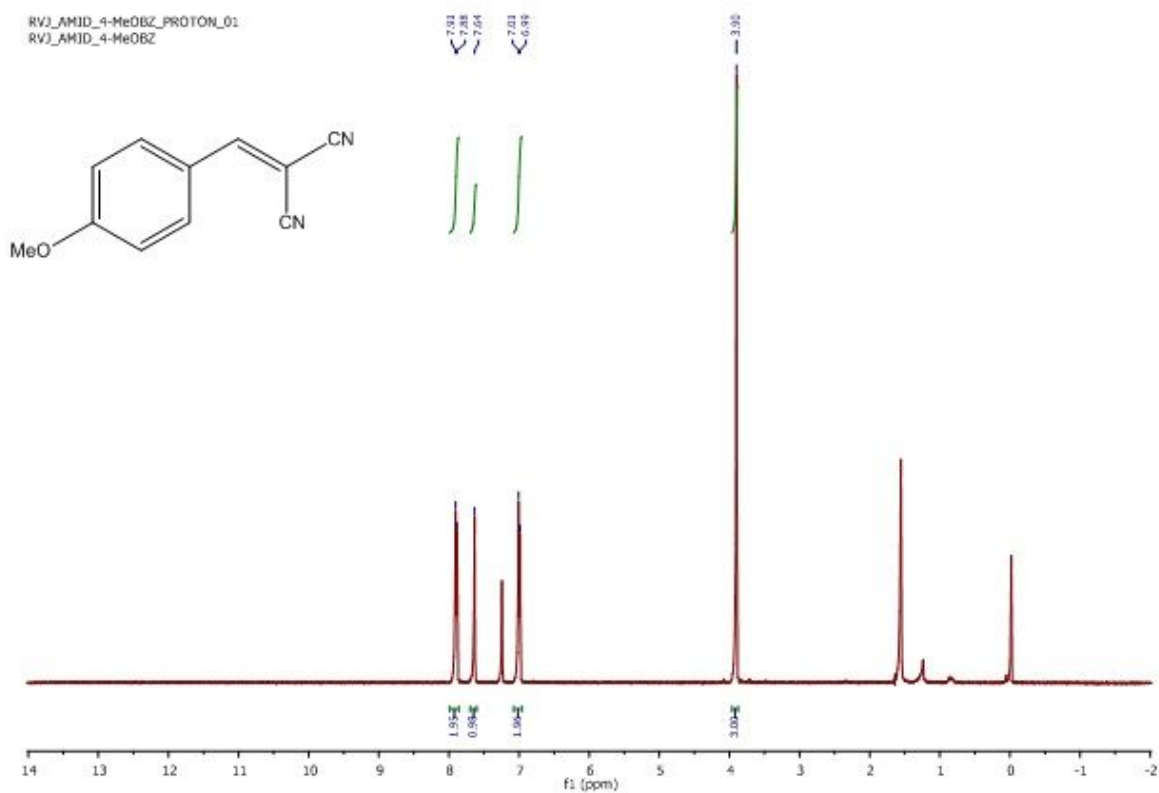

**Figure S17.**  $^1\text{H}$  NMR of 2-(4-methoxybenzylidene)malononitrile

$^1\text{H}$  NMR (400 MHz;  $\text{CDCl}_3$ ; 25 °C):  $\delta = 7.91$  (2H, d,  $J=8.5$  Hz, ph),  $7.01$  (d, 8.5Hz, ph),  $7.77$  (1H, s, CH)

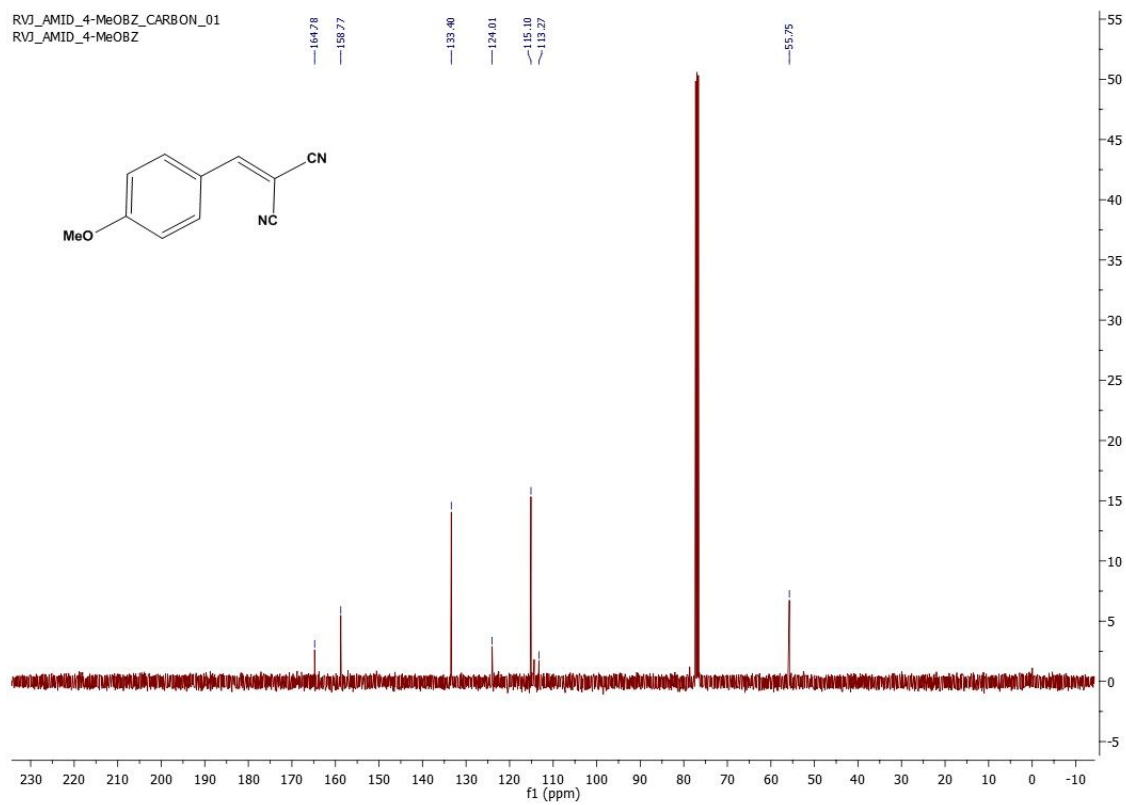

**Figure 18.**  $^{13}\text{C}$  NMR of 2-(4-methoxybenzylidene)malononitrile

$^{13}\text{C}$  NMR; (100MHz;  $\text{CDCl}_3$ ; 25 °C):  $\delta$  164.76, 158.77, 133.40, 124.01, 115.10, 114.5, 113.27, 55.75



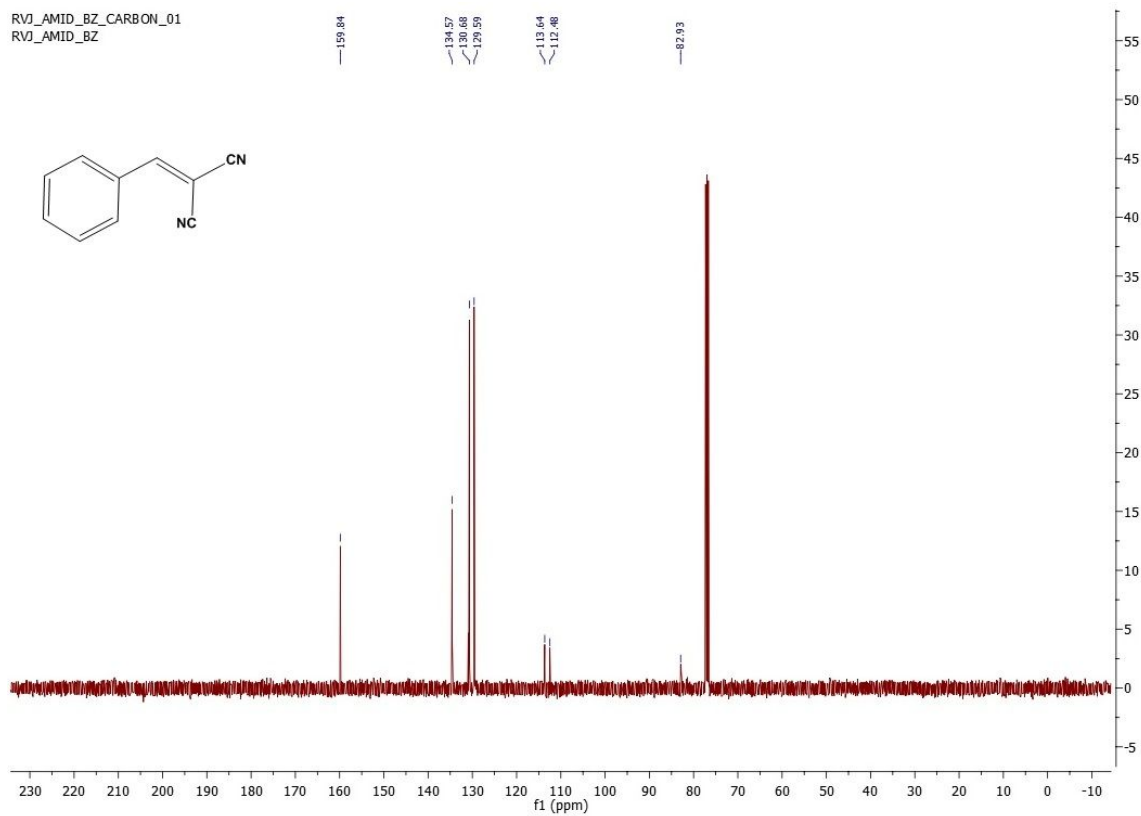

**Figure 20.**  $^{13}\text{C}$  NMR of 2-benzylidenemalononitrile

$^{13}\text{C}$  NMR; (100;  $\text{CDCl}_3$ ; 25 °C):  $\delta$  159.84, 134.57, 130.38, 129.59, 113.85, 112.69, 82.95

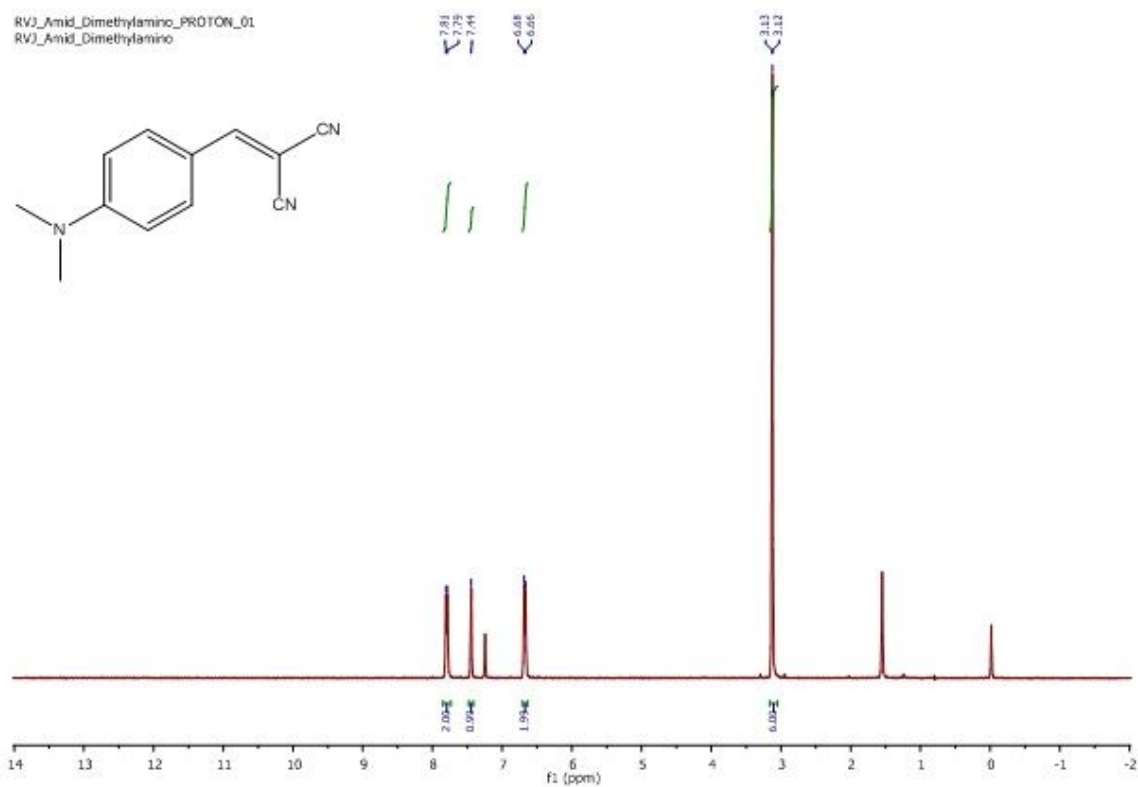

**Figure S21.**  $^1\text{H}$  NMR of 2-(4-(dimethylamino)benzylidene)malononitrile

$^1\text{H}$  NMR (400 MHz;  $\text{CDCl}_3$ ; 25  $^\circ\text{C}$ ):  $\delta$  = 3.13 (6 H, s,  $\text{CH}_3$ ), 6.68 (2 H, d,  $J$  = 9.2 Hz, ph), 7.44 (1H, s, CH), 7.81 (2 H, d,  $J$  = 9.2 Hz, ph).

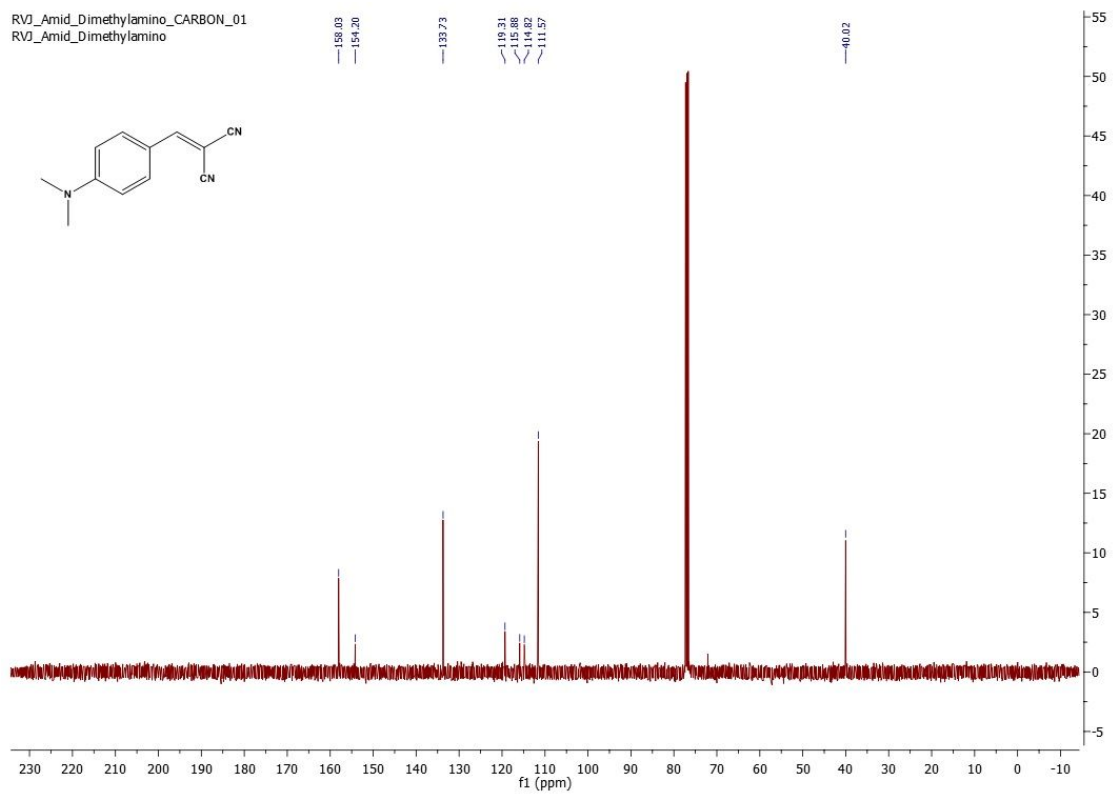

**Figure 22.**  $^{13}\text{C}$  NMR of 2-(4-(dimethylamino)benzylidene)malononitrile

$^{13}\text{C}$  NMR (100 MHz;  $\text{CDCl}_3$ ; 25 °C):  $\delta$  = 158.03, 154.20, 133.73, 119.31, 115.88, 114.82, 111.57, 40.02
